# Supplementary material
Source: PubMed Central journal article supplement (PMC3325043)

**Supplemental Table 1.**

| <b>Supplemental Table 1. Primary Patient Sample Characteristics</b> |               |        |     |        |                                |
|---------------------------------------------------------------------|---------------|--------|-----|--------|--------------------------------|
| Sample Name                                                         | Sample type   | Sex    | Age | FAB    | Karyotype                      |
| B1                                                                  | Bone Marrow   | Female | 60  | M5     | Trisomy 8,<br>Trisomy 9        |
| B2                                                                  | Bone Marrow   | Female | 68  | Non-M3 | 46XX                           |
| B3                                                                  | Bone Marrow   | Female | 79  | M1     | 46XX                           |
| A1                                                                  | leukophoresis | Male   | 55  | M5     | Trisomy 8                      |
| A2                                                                  | leukophoresis | Female | 65  | M5     | Trisomy 8,<br>Isochromosome 13 |
| A3                                                                  | leukophoresis | Female | 66  | M2     | Deletion 6q,<br>+Flt3 ITD      |
| A4                                                                  | leukophoresis | Female | 59  | M4Eo   | Inversion 16                   |
| A5                                                                  | leukophoresis | Male   | 33  | Non-M3 | Monosomy 7,<br>inversion 3     |
| A6                                                                  | leukophoresis | Male   | 53  | M5     | 46XY, +Flt3<br>ITD             |
| A7                                                                  | leukophoresis | Female | 89  | M4     | Complex                        |
| A8                                                                  | leukophoresis | Female | 59  | Non-M3 | 46XX                           |
| A9                                                                  | leukophoresis | Male   | 69  | Non-M3 | 46XY, +Flt3<br>ITD             |
| A10                                                                 | Bone Marrow   | Female | 39  | Non-M3 | Trisomy 8                      |

|     |               |        |    |        |                 |
|-----|---------------|--------|----|--------|-----------------|
| A11 | Bone Marrow   | Female | 67 | Non-M3 | t(8;21)         |
| A12 | Leukophoresis | Male   | 39 | M5b    | 46XY, Flt3 ITD+ |

**Supplementary Figure Legends:**

**Figure S1. FdUMP[10] is effective against cells cultured in human serum.**

HL60 and KG1a cells were cultured in either 10% fetal bovine serum (FBS) or 10% human serum (HS) and exposed to FdUMP[10] as indicated for 72 hours. Viability was determined and normalized to untreated controls.

**Figure S2. p53 shRNA efficiently suppresses p53 induction. Murine AML**

cells expressing either a p53 shRNA or control vector were exposed to 500 ng/ml doxorubicin for 4 hours, then lysed and blotted for p53, p21, and actin as shown. An uninfected control is shown in the far right lane.

**Figure S3. FdUMP[10] is effective against murine leukemia stem cells. (A)**

Murine AML cells expressing MLL-ENL and the Flt3 ITD (MFL2) or NRasG12D (MR2) were incubated for 24 hours with the indicated concentration of FdUMP[10]. Following exposure cell viability was determined by trypan blue exclusion. Animals were injected with  $1 \times 10^6$  viable cells and imaged as indicated. (B) Kaplan-Meier plots of the survival in days of the animals imaged in (A).

**Figure S4. TS and Top1 are expressed in AML cells.** TS and Top1 Western blots. HL60 (H), K562 (K), two MLL-ENL driven murine AML lines (M1 and M2), and nine primary samples from patients with AML samples (A1-A9) were blotted with the indicated antibody.

**Figure S5. FdUMP[10] induces DNA damage.** (A) Immunofluorescence for  $\gamma$ H2AX foci. Jurkat cells were treated with the indicated drug for 24 hours and then assayed for the presence of  $\gamma$ H2AX foci. Assay was done and images captured as in Figure 5A. (B) K562 cells were incubated with 100 nM FdUMP[10] for 24 hours with or without 20  $\mu$ M FMK-ZVAD as indicated. Assay was done and images captured as above except the LPlanFI 20X objective was used.

**Figure S6. FdUMP[10] induces apoptosis in AML cells.** (A) Caspase 3 Western blot results. HL60 cells were treated with the indicated amount of FdUMP[10] for 48 hours. Cells were then lysed and blotted for full length caspase 3. Actin blot serves as a loading control. Relative densitometry values are listed below each lane. (B) Flow cytometry results of Annexin V assays. The indicated MLL-ENL driven leukemia cells were treated with drug for 24 hours analyzed by flow cytometry, as in Figure 5. (B) MLL-ENL and NRas containing AML cells were exposed to the indicated drug for 24 hours and analyzed as in (B).

**Figure S7. FdUMP[10] is cytostatic at low doses and cytotoxic at higher doses.** (A) HL60 cells were seeded at 400,000 cells per ml and incubated with

the indicated amount of FdUMP[10] through 72 hours. Cells were assessed for viability by trypan blue exclusion and counted every 24 hours. The experiment was carried in triplicate and viable cells per ml are shown. Error bars represent the standard error. (B) The murine cell line MFL2 was seeded at 500,000 cells per ml and incubated with the indicated amount of FdUMP[10]. Cells were assessed for viability as above.

**Figure S8. FdUMP[10] is effective *in vivo*.** (A) Bioluminescence signals of mice on day 6 following treatment. C57/Bl6 mice were sublethally irradiated to 4.5 Gy and injected with an MLL-ENL and NRas syngeneic leukemia. Once engraftment was established by bioluminescence imaging, mice were treated with 300 mg/kg FdUMP[10] via jugular vein injection on days 1 and 4. (B) Kaplan-Meier curves for animals treated with FdUMP[10] as above versus no treatment. P value was obtained by log rank test. (C) Kaplan-Meier curves for animals treated with FdUMP[10] at 300 mg/kg every other day for 4 doses by tail vein injection. P value was obtained by log rank test.

**Figure S9. FdUMP[10] is synergistic with Ara-C and doxorubicin.** HL60 cells were incubated with the indicated drugs for 72 hours and viability determined. Viability was normalized to untreated controls. Error bars represent the standard error. Dox=doxorubicin, Fd=FdUMP[10], Ara=Ara-C.

**Supplemental Figures:**

**Figure S1.**

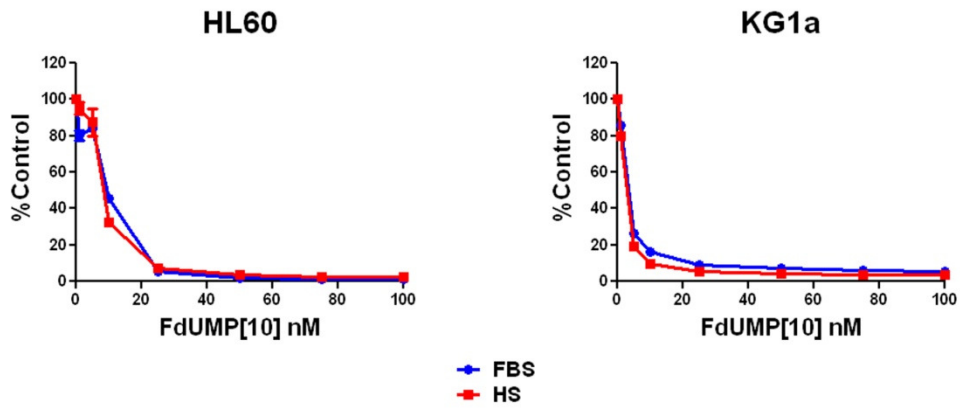

**Figure S2.**

|              |   |   |   |   |   |
|--------------|---|---|---|---|---|
| p53 shRNA:   | - | - | + | + | - |
| Doxorubicin: | - | + | - | + | + |

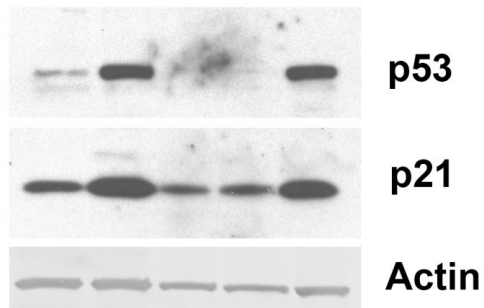

Figure S3.

A

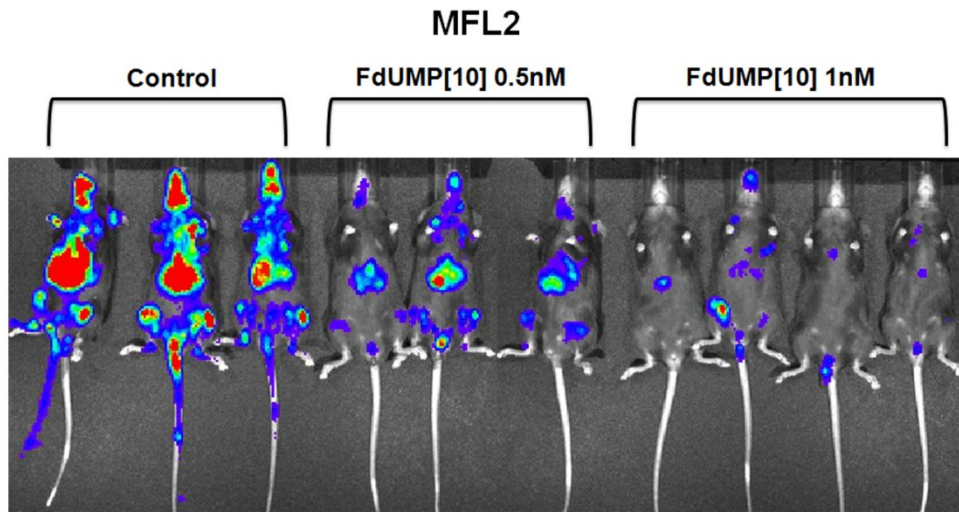

Day 10 post injection

**MR2**

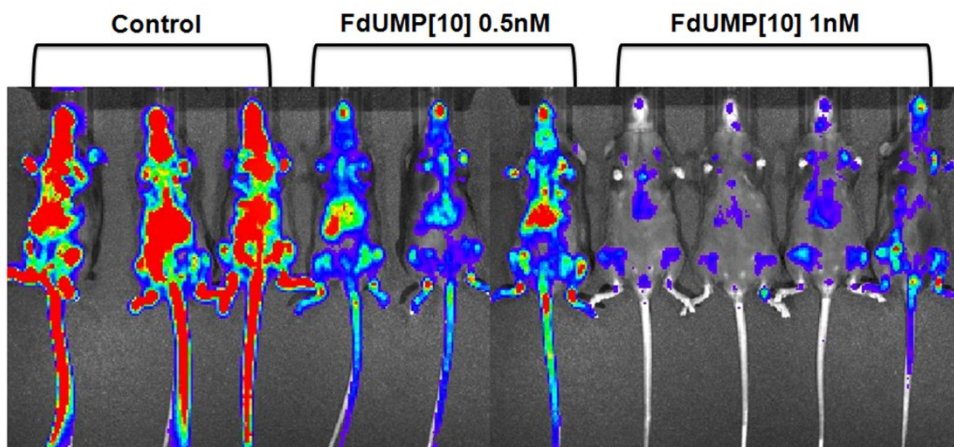

Day 16 post injection

B

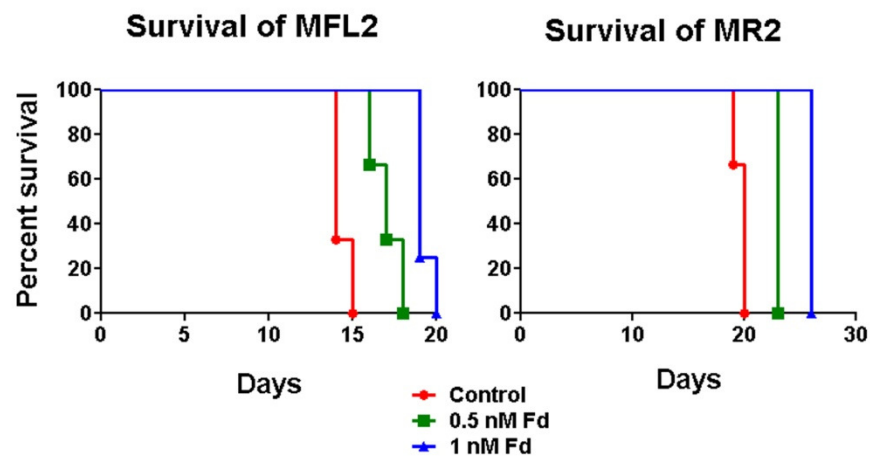

**Figure S4.**

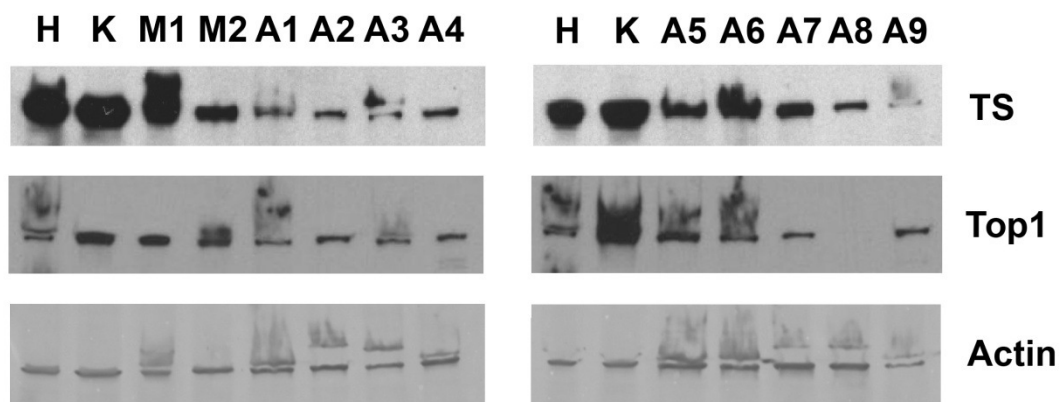

**Figure S5**

**A**

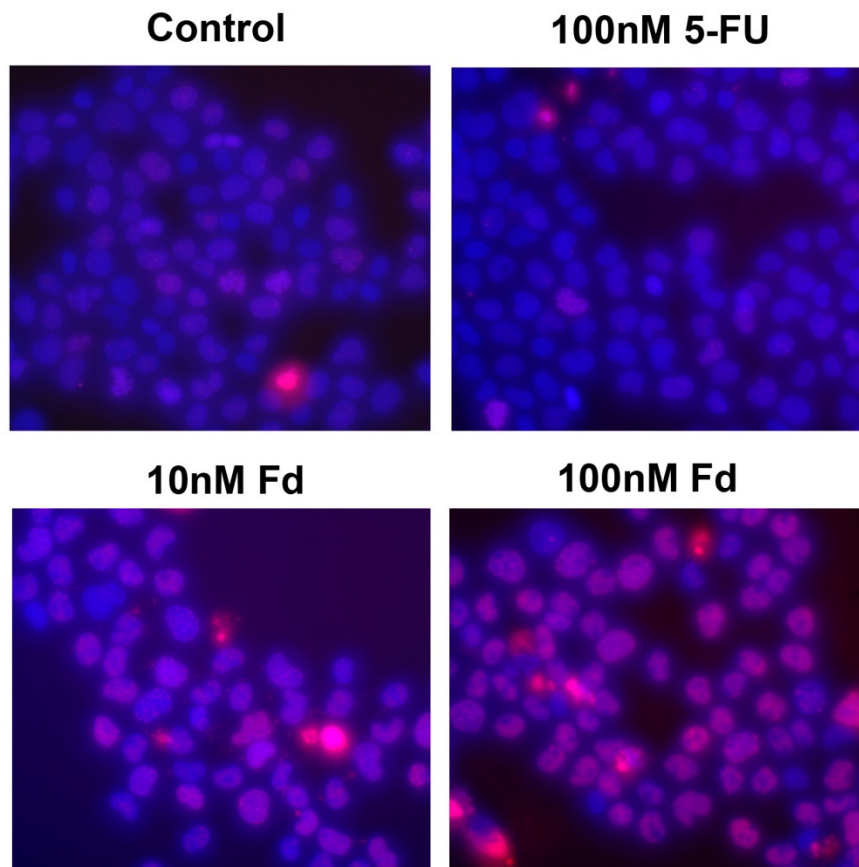

**B**

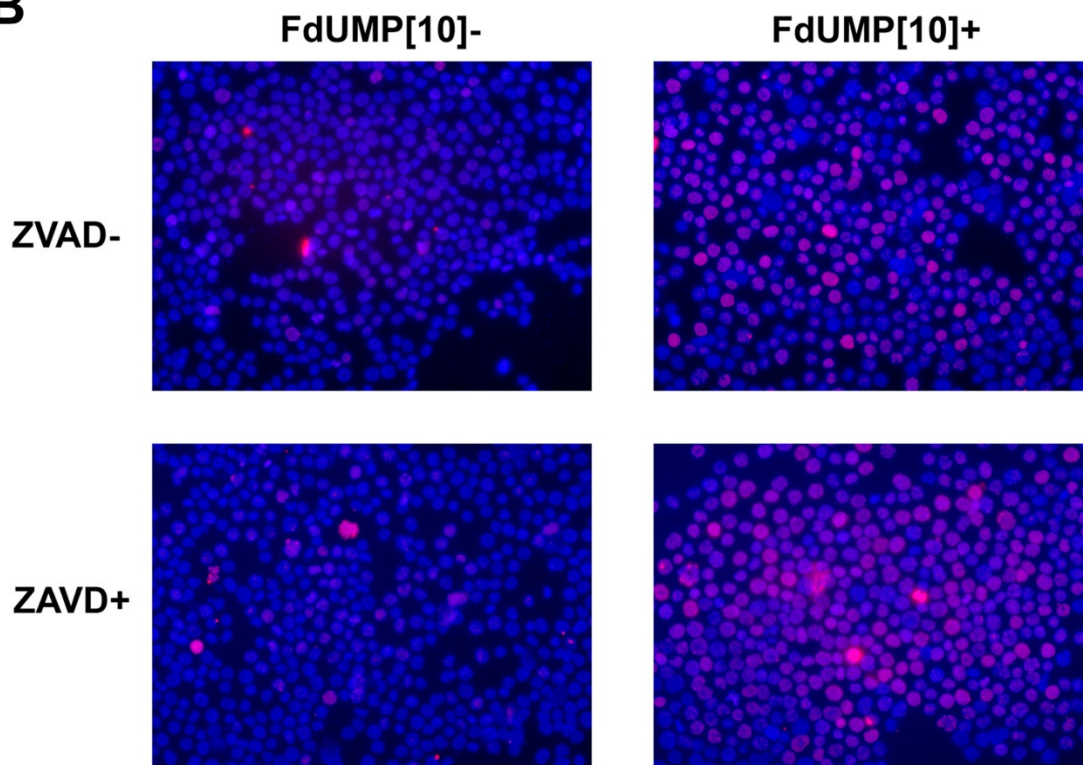



**Figure S6.**

**A**

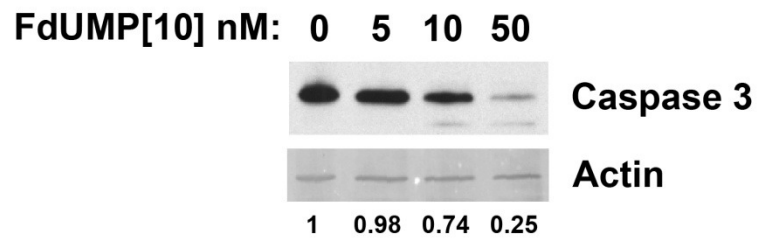

**B**

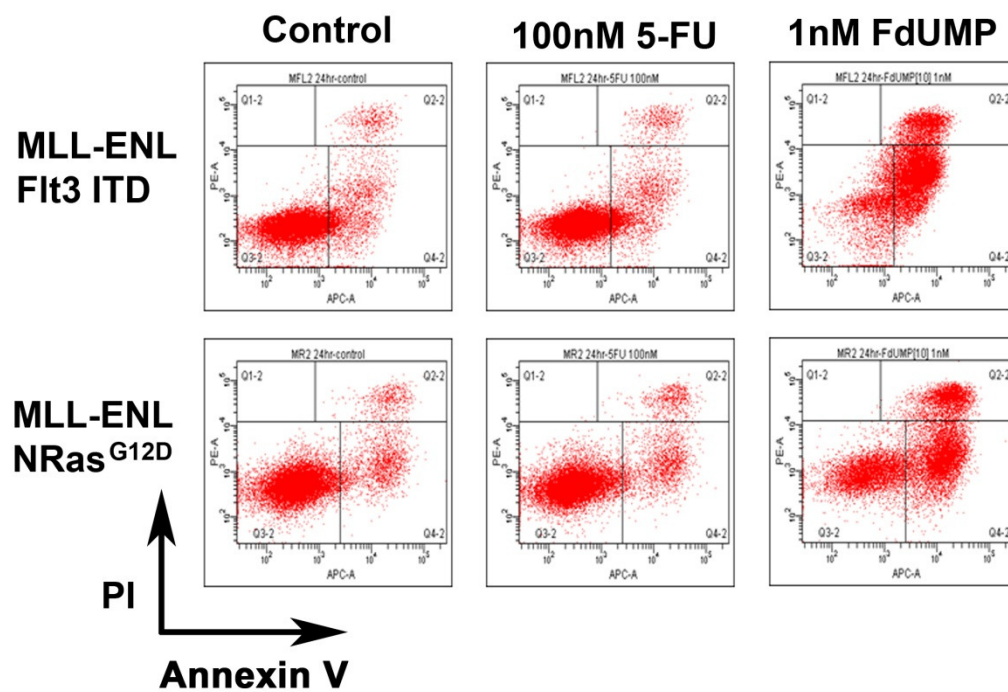

**C**

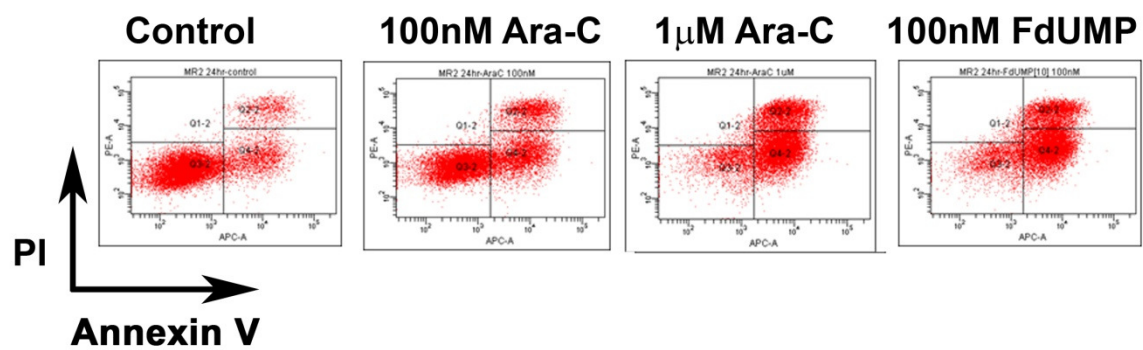

**Figure S7.**

**A**

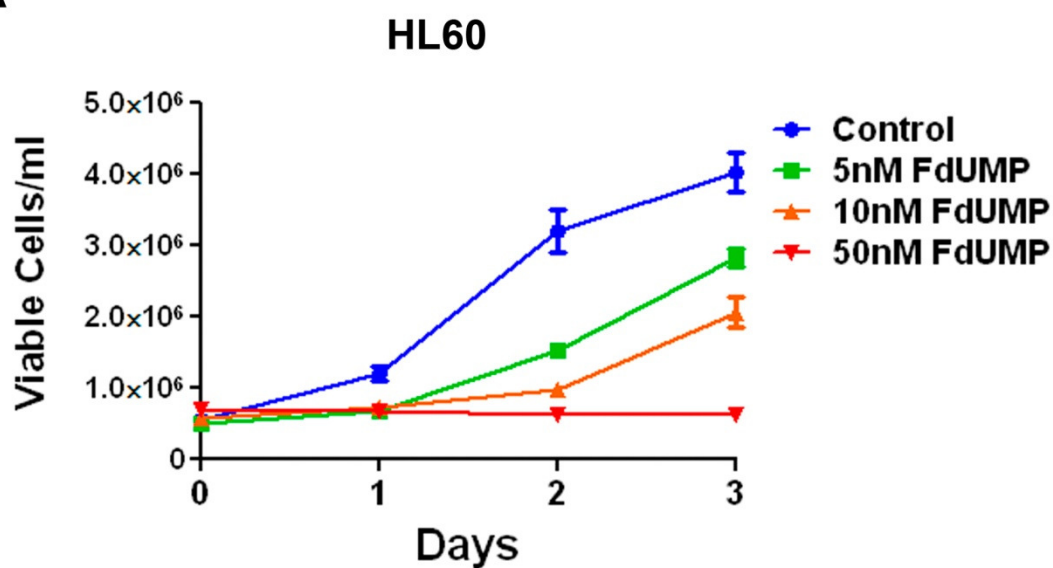

**B**

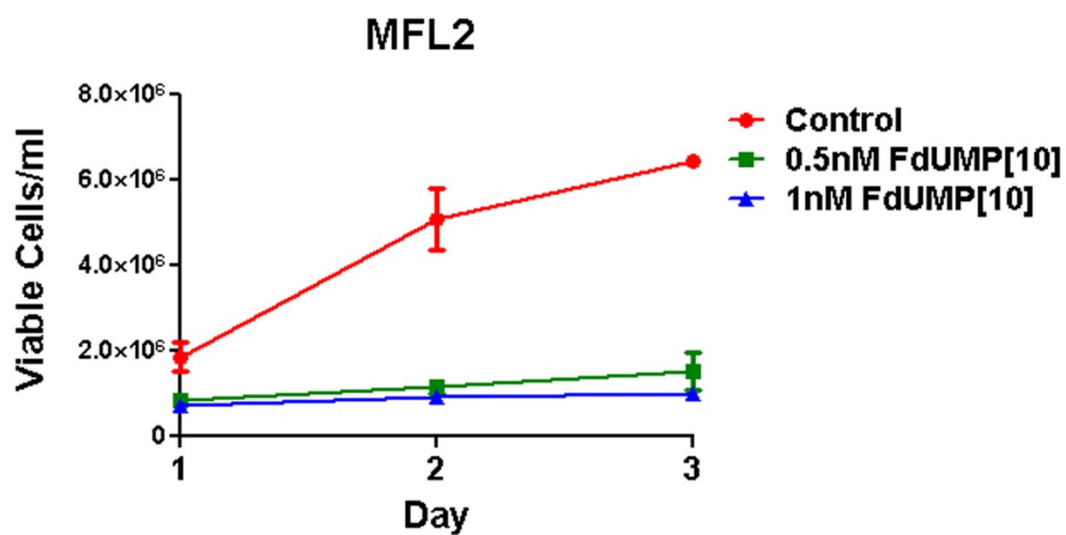

Figure S8.

**A** MLL-ENL + NRas<sup>G12D</sup>

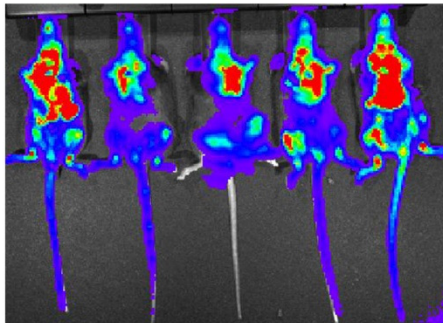

**B**

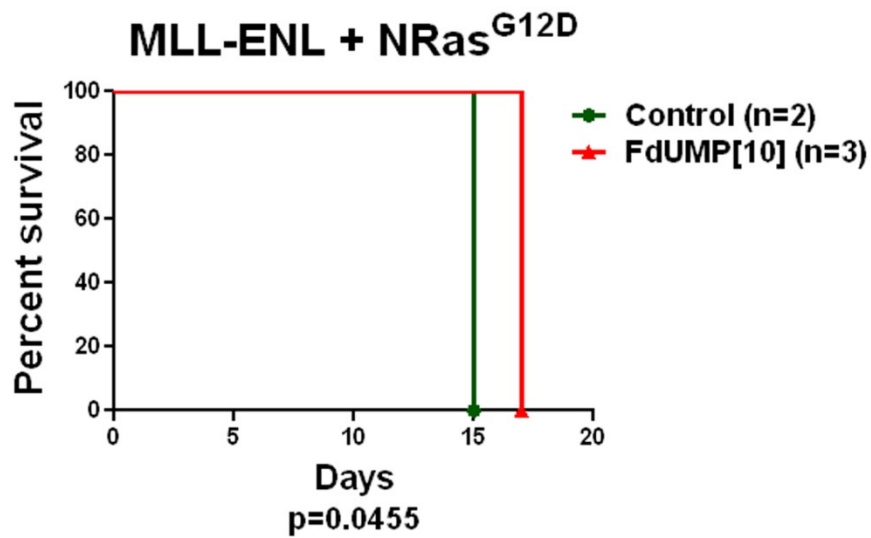

**C**

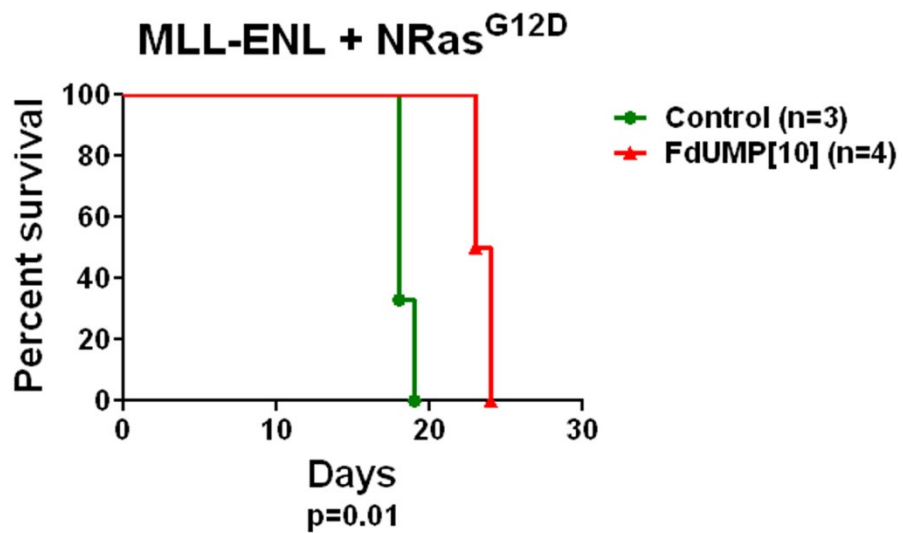

**Figure S9.**

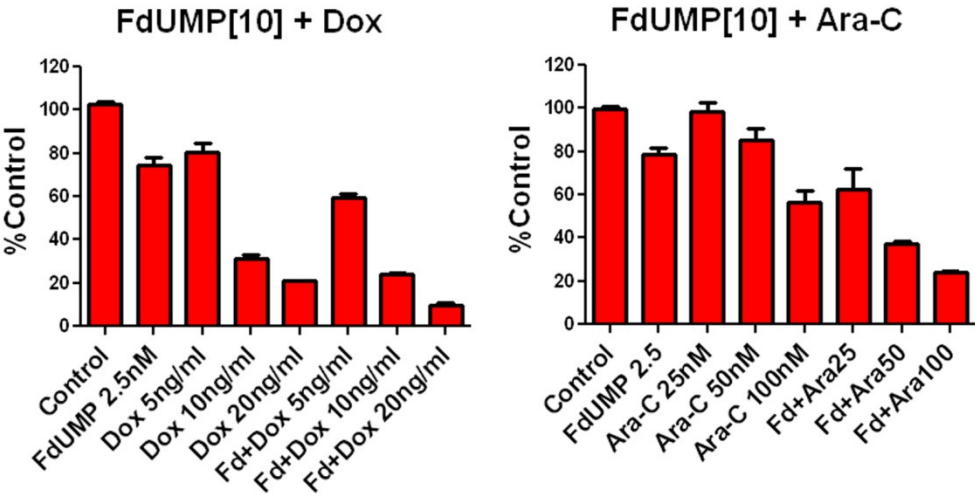

Supplement: supp_blood-2011-06-362442_blood-2011-06-362442-1.pdf [file supp_blood-2011-06-362442_blood-2011-06-362442-1.pdf]
